# Supplementary material for: Hypoxia-Inducible Factor-1 Alpha Expression Is Predictive of Pathological Complete Response in Patients with Breast Cancer Receiving Neoadjuvant Chemotherapy
Source: MDPI journal article supplement (doi:10.3390/cancers14215393), 2022-11-02
Supplement: s1 [file s1]

Table S2. Logistic regression model as a predictive factor of response to treatment.

|                                                      | OR   | 95% CI    | P value      |
|------------------------------------------------------|------|-----------|--------------|
| <b>Basal phenotype</b>                               | 30.1 | 4.5-201.8 | <b>0.001</b> |
| <b>Ki-67 <math>\geq</math> 20%</b>                   | 4.9  | 0.4-53.1  | 0.190        |
| <b>HIF-1<math>\alpha</math> <math>\geq</math> 5%</b> | 2.5  | 0.5-10.6  | 0.213        |

Abbreviations: OR, overall response
