# Supplementary material for: Hypoxia-Inducible Factor-1 Alpha Expression Is Predictive of Pathological Complete Response in Patients with Breast Cancer Receiving Neoadjuvant Chemotherapy
Source: MDPI journal article supplement (doi:10.3390/cancers14215393), 2022-11-02
Supplement: s1 [file s1]

Table S1. Relation between HIF-1 $\alpha$  expression and pAKT and pMAPK

| <b>Variables</b>                   | <b>HIF-1<math>\alpha</math> &lt; 5%</b> | <b>HIF-1<math>\alpha</math> <math>\geq</math> 5%</b> | <b><i>P</i></b>    |
|------------------------------------|-----------------------------------------|------------------------------------------------------|--------------------|
| <b>pAKT &lt; 10%</b>               | 11 (50%)                                | 11 (50%)                                             | 0.316 <sup>a</sup> |
| <b>pAKT <math>\geq</math> 10%</b>  | 34 (63%)                                | 20 (37%)                                             |                    |
| <b>pMAPK &lt; 10%</b>              | 7 (53.8%)                               | 6 (46.2%)                                            | 0.763 <sup>a</sup> |
| <b>pMAPK <math>\geq</math> 10%</b> | 35 (59.3%)                              | 24 (40.7%)                                           |                    |

<sup>a</sup> Fisher exact test
